# Supplementary material for: Prevalence of canid herpesvirus-1 infection in stillborn and dead neonatal puppies in Denmark
Source: PubMed Central journal article supplement (PMC4296690; doi:10.1186/s13028-014-0092-9), 2015-01-08
Supplement: 13028_2014_92_MOESM1_ESM.pdf [file 13028_2014_92_MOESM1_ESM.pdf]

## Additional file 1

**Breed, gender, litter mortality rate and overall polymerase chain reaction (PCR) result for canid herpesvirus-1 (positive (+)/negative (-) in 57 puppies from 37 litter submitted for necropsy.**

| Litter no. | Puppy no. | Breed              | Gender | Death (Days postpartum) | No. of dead puppies/<br>Litter size | PCR result* (+/-) |
|------------|-----------|--------------------|--------|-------------------------|-------------------------------------|-------------------|
| 1          | 1         | Boxer              | M      | 13                      | 8/9                                 | +                 |
| 2          | 2         | Jack Russell       | F      | 12 <sup>E</sup>         | 1/3                                 | +                 |
| 3          | 3         | Labrador           | M      | 2                       | 3/10                                | +                 |
|            | 4         | Labrador           | M      | 3                       |                                     | +                 |
|            | 5         | Labrador           | M      | 4                       |                                     | -                 |
| 4          | 6         | Jack Russell       | M      | 5                       | 5/6                                 | -                 |
|            | 7         | Jack Russell       | M      | 12                      |                                     | +                 |
| 5          | 8         | Retriever cross    | F      | 0                       | 2/2                                 | +                 |
|            | 9         | Retriever cross    | F      | 0                       |                                     | -                 |
| 6          | 10        | Pug                | F      | 17 <sup>E</sup>         | 2/2                                 | -                 |
|            | 11        | Pug                | F      | 17 <sup>E</sup>         |                                     | +                 |
| 7          | 12        | French Bulldog     | F      | 0                       | 3/8                                 | +                 |
|            | 13        | French Bulldog     | F      | 0                       |                                     | +                 |
|            | 14        | French Bulldog     | F      | 0                       |                                     | -                 |
| 8          | 15        | Norwegian Elkhound | M      | 0                       | 1/3                                 | +                 |
| 9          | 16        | Bernese Mountain   | F      | 14 <sup>E</sup>         | 2/11                                | +                 |
| 10         | 17        | Rottweiler         | M      | 1                       | 2/8                                 | +                 |
| 11         | 18        | Grand Danoise      | M      | 14                      | 3/13                                | +                 |
| 12         | 19        | Afghan Hound       | F      | 6                       | 6/10                                | -                 |
| 13         | 20        | Terrier cross      | F      | 0                       | 1/3                                 | -                 |
| 14         | 21        | Finnish Lapphund   | F      | 0                       | 1/7                                 | -                 |
| 15         | 22        | Chihuahua          | M      | 0                       | 1/4                                 | -                 |
| 16         | 23        | St. Bernard        | M      | 0                       | 3/4                                 | -                 |
|            | 24        | St. Bernard        | F      | 0                       |                                     | -                 |
|            | 25        | St. Bernard        | F      | 0                       |                                     | -                 |
| 17         | 26        | Jack Russell       | F      | 0                       | 2/3                                 | -                 |
|            | 27        | Golden Retriever   | M      | 6                       |                                     | -                 |
| 18         | 28        | Golden Retriever   | F      | 4                       | 6/7                                 | -                 |
|            | 29        | Golden Retriever   | F      | 4                       |                                     | -                 |
|            | 30        | Golden Retriever   | F      | 4                       |                                     | -                 |
| 19         | 31        | Dachshund          | F      | 3                       | 2/3                                 | -                 |
|            | 32        | Dachshund          | F      | 0                       |                                     | -                 |
| 20         | 33        | Unknown            | F      | ?**                     | ?                                   | -                 |
| 21         | 34        | Scottish Terrier   | F      | 10 <sup>E</sup>         | 4/6                                 | -                 |
| 22         | 35        | Chihuahua          | M      | 0                       | 2/4                                 | -                 |
|            | 36        | German Shepherd    | M      | 2                       |                                     | -                 |
|            | 37        | German Shepherd    | F      | 2                       | 4/10                                | -                 |
| 23         | 38        | German Shepherd    | M      | 3                       |                                     | -                 |

|    |    |                      |   |                |      |   |
|----|----|----------------------|---|----------------|------|---|
|    | 39 | German Shepherd      | M | 4              |      | - |
| 24 | 40 | Basset Hound         | F | 4              | 3/8  | - |
| 25 | 41 | Beagle               | M | 5              | 2/7  | - |
|    | 42 | Beagle               | M | 6              |      | - |
| 26 | 43 | Danish Mastiff       | F | 1              | 2/12 | - |
| 27 | 44 | Coton De Tulear      | M | 8 <sup>E</sup> | 2/4  | - |
| 28 | 45 | Shih Tzu             | F | 5              | 1/6  | - |
| 29 | 46 | Chihuahua            | M | 10             | 4/5  | - |
| 30 | 47 | Chihuahua            | M | 4              | 1/5  | - |
| 31 | 48 | French Bulldog       | F | 0              | 2/6  | - |
|    | 49 | Jack Russell         | F | 0              |      | - |
| 32 | 50 | Jack Russell         | F | 0              | 3/3  | - |
|    | 51 | Jack Russell         | F | 0              |      | - |
| 33 | 52 | Boxer                | F | 6              | 1/6  | - |
| 34 | 53 | Newfoundland         | M | 0              | 1/10 | - |
| 35 | 54 | Rottweiler           | F | 13             | 7/7  | - |
| 36 | 55 | Boxer/Labrador cross | F | 0              | 1/1  | - |
|    | 56 | German Shepherd      | F | 2              | 5/8  | - |
| 37 | 57 | German Shepherd      | M | 2              |      | - |

\*The PCR analysis was considered positive if one or both of the tissue pools (liver/lung and spleen/kidney) had a crossing point (Cp) value below 40.

\*\* Estimated to a few days old (1-7 days) based on the developmental stage

E: Euthanized
