# Supplementary material for: Prevalence of canid herpesvirus-1 infection in stillborn and dead neonatal puppies in Denmark
Source: PubMed Central journal article supplement (PMC4296690; doi:10.1186/s13028-014-0092-9), 2015-01-08
Supplement: 13028_2014_92_MOESM3_ESM.pdf [file 13028_2014_92_MOESM3_ESM.pdf]

**Additional file 3**

**Real-time polymerase chain reaction assay for canid herpesvirus-1. Results of crossing point values (Cp) of undiluted, 1:10 and 1:100 dilutions.**

| Puppy no. | Dilutions | PCR (Cp value) |               | Additional tissue analyzed | Remarks            |
|-----------|-----------|----------------|---------------|----------------------------|--------------------|
|           |           | Liver/lung     | Spleen/kidney |                            |                    |
| 1         | Undiluted | 16.0           | 16.6          |                            |                    |
| 1         | 1:10      | 13.3           | 13.9          |                            | Positive           |
| 1         | 1:100     | 16.8           | 17.3          |                            |                    |
| 2         | Undiluted | 39.4           | >40*          |                            |                    |
| 2         | 1:10      | 29.5           | 31.4          |                            | Positive           |
| 2         | 1:100     | 33.7           | 34.9          |                            |                    |
| 3         | Undiluted | Neg.           | Neg.          |                            |                    |
| 3         | 1:10      | 32.8           | 32.6          |                            | Positive           |
| 3         | 1:100     | 35.5           | 36.0          |                            |                    |
| 3         | Undiluted | 37.0           | 33.0          |                            |                    |
| 3         | 1:10      | 30.6           | 32.8          |                            | Second preparation |
| 3         | 1:100     | 35.5           | 38            |                            |                    |
| 4         | Undiluted | >40            | Neg.          |                            |                    |
| 4         | 1:10      | 32.9           | 32.5          |                            | Positive           |
| 4         | 1:100     | 36.2           | 35.9          |                            |                    |
| 4         | Undiluted | >40            | 38.0          |                            |                    |
| 4         | 1:10      | >40            | 32.7          |                            | Second preparation |
| 4         | 1:100     | Neg.           | 36.6          |                            |                    |
| 5         | Undiluted | Neg.           | Neg.          |                            |                    |
| 5         | 1:10      | Neg.           | Neg.          |                            |                    |
| 5         | 1:100     | Neg.           | Neg.          |                            |                    |
| 5         | Undiluted | Neg.           | Neg.          |                            |                    |
| 5         | 1:10      | Neg.           | Neg.          |                            | Second preparation |
| 5         | 1:100     | Neg.           | Neg.          |                            |                    |
| 6         | Undiluted | Neg.           | Neg.          |                            |                    |
| 6         | 1:10      | Neg.           | Neg.          |                            |                    |
| 6         | 1:100     | Neg.           | Neg.          |                            |                    |
| 7         | Undiluted | 36.8           | 36.5          |                            |                    |
| 7         | 1:10      | 37.8           | 36.7          |                            | Positive           |
| 7         | 1:100     | 39.0           | 36.8          |                            |                    |
| 8         | Undiluted | 35.7           | NA            |                            | No spleen tissue   |
| 8         | 1:10      | 34.0           | NA            |                            | Positive           |
| 8         | 1:100     | 37.2           | NA            |                            |                    |
| 9         | Undiluted | Neg.           | Neg.          |                            |                    |
| 9         | 1:10      | Neg.           | Neg.          |                            |                    |
| 9         | 1:100     | Neg.           | Neg.          |                            |                    |
| 10        | Undiluted | Neg.           | Neg.          |                            |                    |
| 10        | 1:10      | Neg.           | Neg.          |                            |                    |
| 10        | 1:100     | Neg.           | Neg.          |                            |                    |

| Puppy no. | Dilutions | PCR (Cp value) |               | Additional tissue analyzed | Remarks            |
|-----------|-----------|----------------|---------------|----------------------------|--------------------|
|           |           | Liver/lung     | Spleen/kidney |                            |                    |
| 11        | Undiluted | Neg.           | 35.2          |                            |                    |
| 11        | 1:10      | Neg.           | >40           |                            | Positive           |
| 11        | 1:100     | Neg.           | 37.7          |                            |                    |
| 12        | Undiluted | 37.1           | >40           |                            |                    |
| 12        | 1:10      | >40            | 39.4          |                            | Positive           |
| 12        | 1:100     | >40            | Neg.          |                            |                    |
| 13        | Undiluted | 33.1           | >40           |                            |                    |
| 13        | 1:10      | 34.8           | 36.9          |                            | Positive           |
| 13        | 1:100     | 39.5           | >40           |                            |                    |
| 14        | Undiluted | Neg.           | Neg.          |                            |                    |
| 14        | 1:10      | Neg.           | Neg.          |                            |                    |
| 14        | 1:100     | Neg.           | Neg.          |                            |                    |
| 15        | Undiluted | 32.8           | 38.5          |                            |                    |
| 15        | 1:10      | 35.7           | >40           |                            | Positive           |
| 15        | 1:100     | Neg.           | Neg.          |                            |                    |
| 16        | Undiluted | 34.5           | 38.5          |                            |                    |
| 16        | 1:10      | 38.9           | Neg.          |                            | Positive           |
| 16        | 1:100     | Neg.           | Neg.          |                            |                    |
| 17        | Undiluted | 29.6           | 36.6          |                            |                    |
| 17        | 1:10      | 33.6           | >40           |                            | Positive           |
| 17        | 1:100     | 36.9           | Neg.          |                            |                    |
| 18        | Undiluted | 29.7           | Neg.          |                            |                    |
| 18        | 1:10      | 31.3           | Neg.          |                            | Positive           |
| 18        | 1:100     | 35.6           | Neg.          |                            |                    |
| 19        | Undiluted | Neg.           | Neg.          | Heart: 37.8                |                    |
| 19        | 1:10      | Neg.           | Neg.          | Heart: 38.2                | Positive           |
| 19        | 1:100     | Neg.           | Neg.          | Heart: Neg.                |                    |
| 19        | Undiluted | Neg.           | Neg.          | Heart: >40                 | Second preparation |
| 19        | 1:10      | Neg.           | Neg.          | Heart: Neg.                | Negative           |
| 19        | 1:100     | Neg.           | Neg.          | Heart: Neg.                |                    |
| 20        | Undiluted | Neg.           | Neg.          |                            |                    |
| 20        | 1:10      | Neg.           | Neg.          |                            |                    |
| 20        | 1:100     | Neg.           | Neg.          |                            |                    |
| 21        | Undiluted | Neg.           | Neg.          |                            |                    |
| 21        | 1:10      | Neg.           | Neg.          |                            |                    |
| 21        | 1:100     | Neg.           | Neg.          |                            |                    |
| 22        | Undiluted | Neg.           | Neg.          |                            |                    |
| 22        | 1:10      | Neg.           | Neg.          |                            |                    |
| 22        | 1:100     | Neg.           | Neg.          |                            |                    |
| 23        | Undiluted | Neg.           | Neg.          |                            |                    |
| 23        | 1:10      | Neg.           | Neg.          |                            |                    |
| 23        | 1:100     | Neg.           | Neg.          |                            |                    |
| 24        | Undiluted | Neg.           | Neg.          |                            |                    |
| 24        | 1:10      | Neg.           | Neg.          |                            |                    |
| 24        | 1:100     | Neg.           | Neg.          |                            |                    |

| Puppy no. | Dilutions | PCR (Cp value) |               | Additional tissue analyzed | Remarks |
|-----------|-----------|----------------|---------------|----------------------------|---------|
|           |           | Liver/lung     | Spleen/kidney |                            |         |
| 25        | Undiluted | Neg.           | Neg.          |                            |         |
| 25        | 1:10      | Neg.           | Neg.          |                            |         |
| 25        | 1:100     | Neg.           | Neg.          |                            |         |
| 26        | Undiluted | Neg.           | Neg.          |                            |         |
| 26        | 1:10      | Neg.           | Neg.          |                            |         |
| 26        | 1:100     | Neg.           | Neg.          |                            |         |
| 27        | Undiluted | Neg.           | Neg.          |                            |         |
| 27        | 1:10      | Neg.           | Neg.          |                            |         |
| 27        | 1:100     | Neg.           | Neg.          |                            |         |
| 28        | Undiluted | Neg.           | Neg.          |                            |         |
| 28        | 1:10      | Neg.           | Neg.          |                            |         |
| 28        | 1:100     | Neg.           | Neg.          |                            |         |
| 29        | Undiluted | Neg.           | Neg.          |                            |         |
| 29        | 1:10      | Neg.           | Neg.          |                            |         |
| 29        | 1:100     | Neg.           | Neg.          |                            |         |
| 30        | Undiluted | Neg.           | Neg.          |                            |         |
| 30        | 1:10      | Neg.           | Neg.          |                            |         |
| 30        | 1:100     | Neg.           | Neg.          |                            |         |
| 31        | Undiluted | Neg.           | Neg.          |                            |         |
| 31        | 1:10      | Neg.           | Neg.          |                            |         |
| 31        | 1:100     | Neg.           | Neg.          |                            |         |
| 32        | Undiluted | Neg.           | Neg.          |                            |         |
| 32        | 1:10      | Neg.           | Neg.          |                            |         |
| 32        | 1:100     | Neg.           | Neg.          |                            |         |
| 33        | Undiluted | Neg.           | Neg.          |                            |         |
| 33        | 1:10      | Neg.           | Neg.          |                            |         |
| 33        | 1:100     | Neg.           | Neg.          |                            |         |
| 34        | Undiluted | >40            | Neg.          |                            |         |
| 34        | 1:10      | Neg.           | Neg.          |                            |         |
| 34        | 1:100     | Neg.           | Neg.          |                            |         |
| 35        | Undiluted | Neg.           | Neg.          |                            |         |
| 35        | 1:10      | Neg.           | Neg.          |                            |         |
| 35        | 1:100     | Neg.           | Neg.          |                            |         |
| 36        | Undiluted | Neg.           | Neg.          |                            |         |
| 36        | 1:10      | Neg.           | Neg.          |                            |         |
| 36        | 1:100     | Neg.           | Neg.          |                            |         |
| 37        | Undiluted | Neg.           | Neg.          |                            |         |
| 37        | 1:10      | Neg.           | Neg.          |                            |         |
| 37        | 1:100     | Neg.           | Neg.          |                            |         |
| 38        | Undiluted | Neg.           | Neg.          |                            |         |
| 38        | 1:10      | Neg.           | Neg.          |                            |         |
| 38        | 1:100     | Neg.           | Neg.          |                            |         |
| 39        | Undiluted | Neg.           | Neg.          |                            |         |
| 39        | 1:10      | Neg.           | Neg.          |                            |         |
| 39        | 1:100     | Neg.           | Neg.          |                            |         |

| Puppy no. | Dilutions | PCR (Cp value) |               | Additional tissue analyzed | Remarks |
|-----------|-----------|----------------|---------------|----------------------------|---------|
|           |           | Liver/lung     | Spleen/kidney |                            |         |
| 40        | Undiluted | Neg.           | Neg.          |                            |         |
| 40        | 1:10      | Neg.           | Neg.          |                            |         |
| 40        | 1:100     | Neg.           | Neg.          |                            |         |
| 41        | Undiluted | Neg.           | Neg.          |                            |         |
| 41        | 1:10      | Neg.           | Neg.          |                            |         |
| 41        | 1:100     | Neg.           | Neg.          |                            |         |
| 42        | Undiluted | >40            | Neg.          |                            |         |
| 42        | 1:10      | Neg.           | Neg.          |                            |         |
| 42        | 1:100     | Neg.           | Neg.          |                            |         |
| 43        | Undiluted | Neg.           | Neg.          |                            |         |
| 43        | 1:10      | Neg.           | Neg.          |                            |         |
| 43        | 1:100     | Neg.           | Neg.          |                            |         |
| 44        | Undiluted | Neg.           | Neg.          |                            |         |
| 44        | 1:10      | Neg.           | Neg.          |                            |         |
| 44        | 1:100     | Neg.           | Neg.          |                            |         |
| 45        | Undiluted | Neg.           | Neg.          |                            |         |
| 45        | 1:10      | Neg.           | Neg.          |                            |         |
| 45        | 1:100     | Neg.           | Neg.          |                            |         |
| 46        | Undiluted | Neg.           | Neg.          |                            |         |
| 46        | 1:10      | Neg.           | >40           |                            |         |
| 46        | 1:100     | Neg.           | Neg.          |                            |         |
| 47        | Undiluted | Neg.           | Neg.          |                            |         |
| 47        | 1:10      | Neg.           | Neg.          |                            |         |
| 47        | 1:100     | Neg.           | Neg.          |                            |         |
| 48        | Undiluted | Neg.           | Neg.          |                            |         |
| 48        | 1:10      | Neg.           | Neg.          |                            |         |
| 48        | 1:100     | Neg.           | Neg.          |                            |         |
| 49        | Undiluted | Neg.           | Neg.          |                            |         |
| 49        | 1:10      | Neg.           | Neg.          |                            |         |
| 49        | 1:100     | Neg.           | Neg.          |                            |         |
| 50        | Undiluted | Neg.           | Neg.          |                            |         |
| 50        | 1:10      | Neg.           | Neg.          |                            |         |
| 50        | 1:100     | Neg.           | Neg.          |                            |         |
| 51        | Undiluted | Neg.           | Neg.          |                            |         |
| 51        | 1:10      | Neg.           | Neg.          |                            |         |
| 51        | 1:100     | Neg.           | Neg.          |                            |         |
| 52        | Undiluted | Neg.           | Neg.          |                            |         |
| 52        | 1:10      | Neg.           | Neg.          |                            |         |
| 52        | 1:100     | Neg.           | Neg.          |                            |         |
| 53        | Undiluted | Neg.           | Neg.          |                            |         |
| 53        | 1:10      | Neg.           | Neg.          |                            |         |
| 53        | 1:100     | Neg.           | Neg.          |                            |         |
| 54        | Undiluted | Neg.           | Neg.          |                            |         |
| 54        | 1:10      | Neg.           | Neg.          |                            |         |
| 54        | 1:100     | Neg.           | Neg.          |                            |         |

| Puppy no. | Dilutions | PCR (Cp value) |               | Additional tissue analyzed | Remarks |
|-----------|-----------|----------------|---------------|----------------------------|---------|
|           |           | Liver/lung     | Spleen/kidney |                            |         |
| 55        | Undiluted | Neg.           | Neg.          |                            |         |
| 55        | 1:10      | Neg.           | Neg.          |                            |         |
| 55        | 1:100     | Neg.           | Neg.          |                            |         |
| 56        | Undiluted | Neg.           | Neg.          |                            |         |
| 56        | 1:10      | Neg.           | Neg.          |                            |         |
| 56        | 1:100     | Neg.           | Neg.          |                            |         |
| 57        | Undiluted | Neg.           | Neg.          |                            |         |
| 57        | 1:10      | Neg.           | Neg.          |                            |         |
| 57        | 1:100     | Neg.           | Neg.          |                            |         |

NA: Tissues not available

Neg.: Negative sample.

\*Cp > 40 was considered positive though indicating a minimal amount of nuclei acid.
